# Supplementary material
Source: PubMed Central journal article supplement (PMC7448633)
Supplement: JCM.00214-20-s0002.pdf [file JCM.00214-20-s0002.pdf]

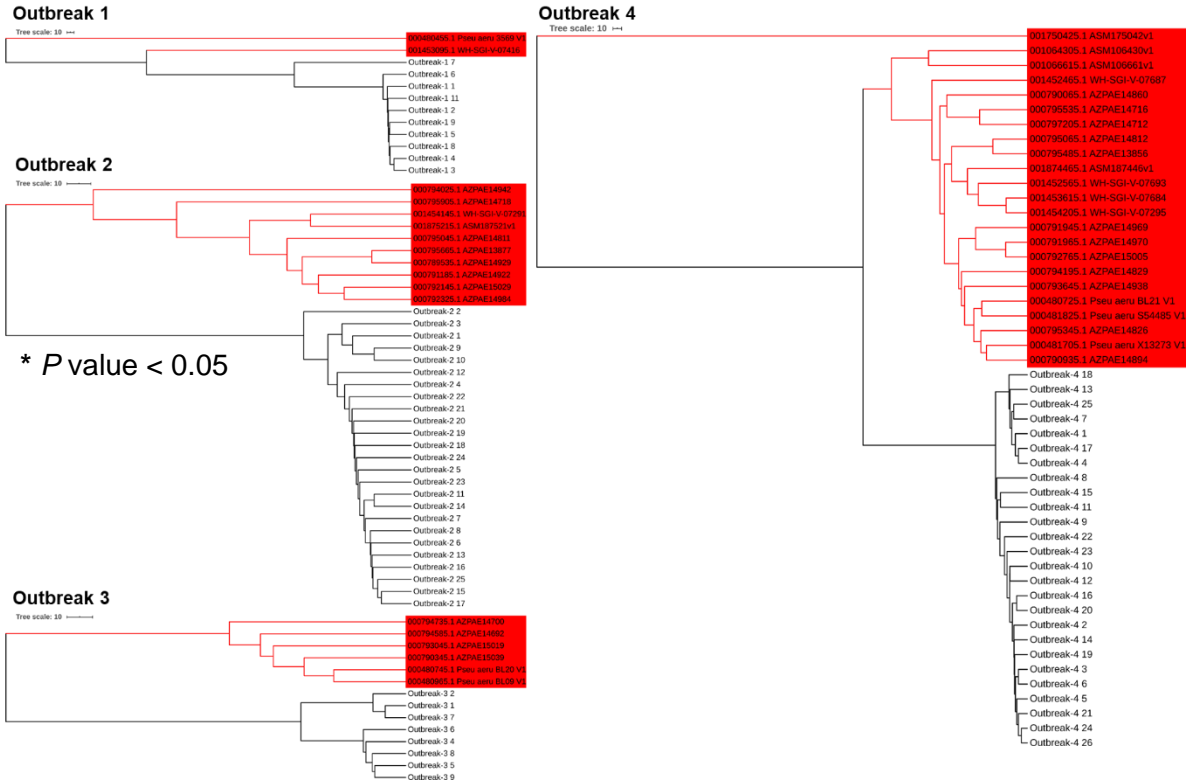

**Figure S1.** cgMLST trees differentiate unrelated reference genomes of same ST (in red) from outbreak isolates.

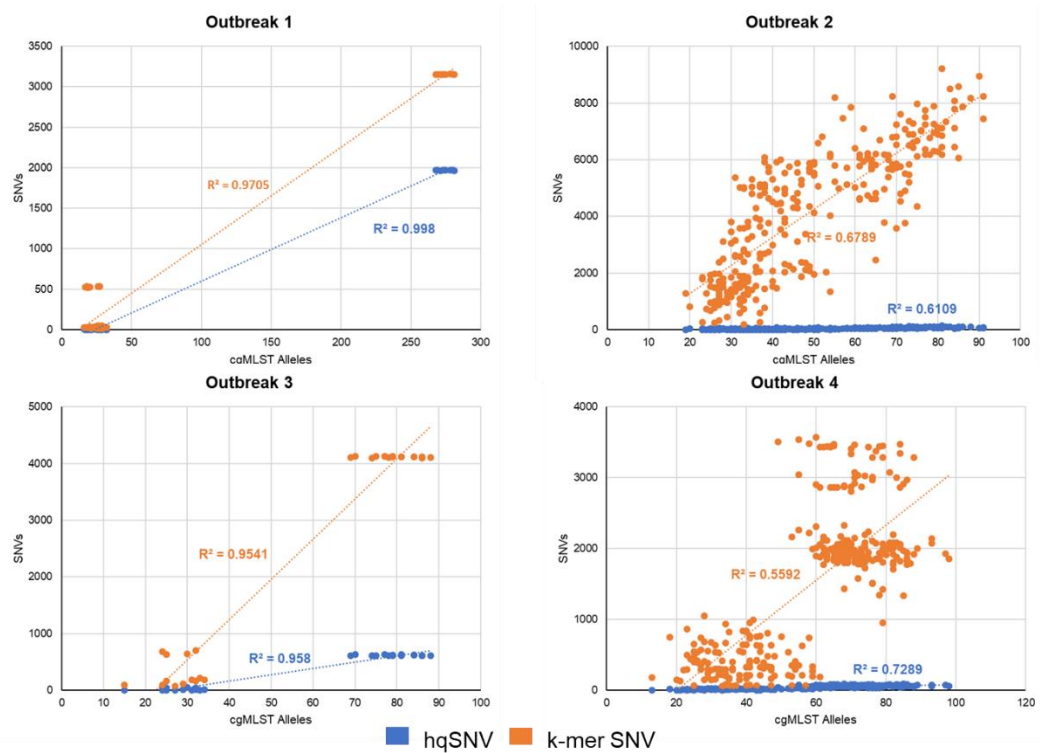

**Figure S2.** Pairwise comparison of cgMLST allele differences (x-axis) to SNVs (y-axis) for all four outbreaks show correlations for both hqSNV (SNVPhyl) and k-mer SNV (kSNP) pipelines.

**Table S1.** *P. aeruginosa* cgMLST Allele Counts Found in *P. aeruginosa* Group Reference Genomes

| <b>Genome</b>                        | <b>Species</b>            | <b><i>P. aeruginosa</i> cgMLST Alleles Present</b> |
|--------------------------------------|---------------------------|----------------------------------------------------|
| GCA_000412695.1_ASM41269v1           | <i>P. resinovorans</i>    | 152                                                |
| GCF_000510765.1_ASM51076v1           | <i>P. oleovorans</i>      | 51                                                 |
| GCF_900103845.1_IMG-taxon_2663762768 | <i>P. jinjuensis</i>      | 413                                                |
| GCA_000016565.1_ASM1656v1            | <i>P. mendocina</i>       | 87                                                 |
| NZ_AP014862.1                        | <i>P. caeni</i>           | 0                                                  |
| GCA_900100535.1_IMG-taxon_2663762794 | <i>P. flavescens</i>      | 30                                                 |
| GCA_002204635.1_ASM220463v1          | <i>P. nitroreducens</i>   | 296                                                |
| NZ_CP014784.1                        | <i>P. alcaligenes</i>     | 99                                                 |
| GCA_900105355.1_IMG-taxon_2687453785 | <i>P. anguilliseptica</i> | 9                                                  |
| GCA_900112645.1_IMG-taxon_2663762767 | <i>P. straminea</i>       | 36                                                 |
| GCA_001654435.1_ASM165443v1          | <i>P. citronellois</i>    | 463                                                |
| NZ_AP014862.1                        | <i>P. furukawaii</i>      | 139                                                |

**Table S2.** Comparison of cgMLST Trees Generated by Neighbor Joining (NJ) or Unweighted Pair Group Method with Arithmetic mean (UPGMA) Methods to hqSNV Trees

| Outbreak | cgMLST Tree Type | Similarity Score | Average SNV Tree Similarity to 10,000 Random Trees | cgMLST Tree More Similar Than Average | P value                |
|----------|------------------|------------------|----------------------------------------------------|---------------------------------------|------------------------|
| 1        | NJ               | 11.40            | 12.16                                              | Yes                                   | 0.30                   |
| 1        | UPGMA            | 10.44            | 12.15                                              | Yes                                   | 0.12                   |
| 2        | NJ               | 42.38            | 44.08                                              | Yes                                   | 0.32                   |
| 2        | UPGMA            | 100.28           | 44.04                                              | No                                    | N/A                    |
| 3        | NJ               | 8.54             | 8.39                                               | No                                    | N/A                    |
| 3        | UPGMA            | 5.48             | 8.40                                               | Yes                                   | $1.5 \times 10^{-2*}$  |
| 4        | NJ               | 68.12            | 59.81                                              | No                                    | N/A                    |
| 4        | UPGMA            | 35.47            | 59.75                                              | Yes                                   | $1.4 \times 10^{-14*}$ |

\*  $P$  value < 0.05

**Table S3.** Description of Outbreaks and Comparison of cgMLST to PFGE Trees

| <b>Outbreak</b> | <b>Number of Isolates</b> | <b>MLST ST (# of isolates)</b> | <b>P-value of Tree Similarity</b> |
|-----------------|---------------------------|--------------------------------|-----------------------------------|
| 1               | 12                        | 164 (10), 27 (1), 810 (1)      | 0.026*                            |
| 2               | 12                        | 233 (12)                       | 0.017*                            |
| 3               | 9                         | 309 (7), 1158 (1), 2775 (1)    | 3.6 x 10 <sup>-5</sup> *          |

\* *P* value < 0.05

**Table S4.** Recombined Alleles in Outbreaks

| <b>Outbreak</b> | <b>Total Unique Alleles</b> | <b>Recombination Alleles (%)</b> |
|-----------------|-----------------------------|----------------------------------|
| 1               | 4815                        | 57 (1.2)                         |
| 2               | 4928                        | 115 (2.3)                        |
| 3               | 4601                        | 35 (0.76)                        |
| 4               | 5001                        | 191 (3.8)                        |

## **Supplemental Spreadsheet Descriptions**

**Spreadsheet S1.** Complete *P. aeruginosa* genomes used to build cgMLST scheme.

**Spreadsheet S2.** Descriptions of 4400 genes making up cgMLST scheme. The counts of unique, missing, and multiple copy alleles as well as the Z-scores are from the 2049 *P. aeruginosa* genomes from RefSeq included in the study.

**Spreadsheet S3.** Descriptions of 2049 *P. aeruginosa* genomes from RefSeq used in study.
